# Supplementary material
Source: PubMed Central journal article supplement (PMC1975843)
Supplement: blood_blood-2007-01-066258_2.pdf [file blood_blood-2007-01-066258_2.pdf]

| Pt # | Age | Sex | GPI(-) granulocytes (%) | Initial Treatment | CBC at Sampling |        |        | Response to Tx    |
|------|-----|-----|-------------------------|-------------------|-----------------|--------|--------|-------------------|
|      |     |     |                         |                   | Hgb (g/dl)      | ANC/ul | PLT/ul |                   |
| 1    | 27  | F   | 2.56                    | ATG/CsA           | 8.6             | 100    | 13.000 | Partial response  |
| 2    | 52  | F   | 0.36                    | ATG/CsA           | 8.5             | 400    | 15.000 | N/A               |
| 3    | 40  | M   | 0.43                    | Alemtuzumab       | 8.3             | 100    | 2.000  | Non-responder     |
| 4    | 42  | M   | 0.31                    | ATG/CsA           | 8.5             | 185    | 7.000  | Non-responder     |
| 5    | 54  | F   | 0.81                    | ATG/CsA           | 8.8             | 500    | 10.000 | Partial response  |
| 6    | 35  | M   | 0.17                    | ATG/CsA           | 7.5             | 250    | 5.000  | Non-responder     |
| 7    | 29  | M   | 0.11                    | ATG/CsA           | 8.5             | 200    | 10.000 | N/A               |
| 8    | 23  | F   | 0.06                    | ATG/CsA           | 7.0             | 150    | 5.000  | Non-responder     |
| 9    | 17  | F   | 0.38                    | ATG/CsA           | 3.5             | 500    | 12.000 | Complete response |
| 10   | 30  | F   | 0.08                    | Alemtuzumab       | 7.1             | 280    | 11.000 | Partial response  |
| 11   | 49  | M   | 0.15                    | ATG/CsA           | 6.0             | 600    | 3.000  | Partial response  |
| 12   | 38  | M   | 0.24                    | ATG/CsA           | 7.5             | 350    | 5.000  | Partial response  |
| 13   | 23  | M   | 0.4                     | ATG/CsA           | 6.5             | 150    | 15.000 | Non-responder     |
| 14   | 50  | F   | 7.8                     | ATG/CsA           | 5.5             | 300    | 9.000  | Partial response  |
| 15   | 16  | M   | 0.9                     | ATG/CsA           | 8.2             | 350    | 15.000 | N/A               |
| 16   | 30  | M   | 0.2                     | ATG/CsA           | 9.0             | 600    | 10.000 | Partial response  |
| 17   | 30  | F   | 0.1                     | ATG/CsA           | 8.9             | 300    | 11.000 | Partial response  |
| 18   | 13  | F   | 4                       | ATG/CsA           | 8               | 1.000  | 15.000 | N/A               |
| 19   | 56  | F   | 0.02                    | ATG/CsA           | 9               | 800    | 20.000 | N/A               |
| 20   | 33  | F   | 0.17                    | ATG/CsA           | 7.0             | 250    | 5.000  | Non-responder     |
